# Supplementary material for: Solid Electrolyte Failure by Dendrite-Induced Local Phase Transition
Source: Research Square preprint supplement (doi:10.21203/rs.3.rs-8014532/v1), 2025-12-11
Supplement: Supplementary file 1 [file c8e8cb05d7300c8149211cf7.docx]

Supplementary Information

**Solid Electrolyte Failure by Dendrite-Induced Local Phase Transition**

Ruixin Hao1†, Tianyi Gao1†, Jiecheng Diao2†, Wenbo Zhai1, Xinshui zhang1, Hongsheng Shi1, Yue Zhang1, Jinjiang Liang1, Ian Robinson3, Jiadong Fan2*, Huaidong Jiang2*, Yi Yu1*, and Wei Liu1*

1State Key Laboratory of Quantum Functional Materials, School of Physical Science and Technology, Shanghai Key Laboratory of High-resolution Electron Microscopy, ShanghaiTech University, Shanghai 201210, China.

2Center for Transformative Science, ShanghaiTech University, Shanghai 201210, China

3London Centre for Nanotechnology, University College London, London WC1E 6BT, UK

† These authors contributed equally to this work.

*Corresponding author. Email: fanjd@shanghaitech.edu.cn (J.F.), jianghd@shanghaitech.edu.cn (H.J.), yuyi1@shanghaitech.edu.cn (Y.Y.), liuwei1@shanghaitech.edu.cn (W.L.)


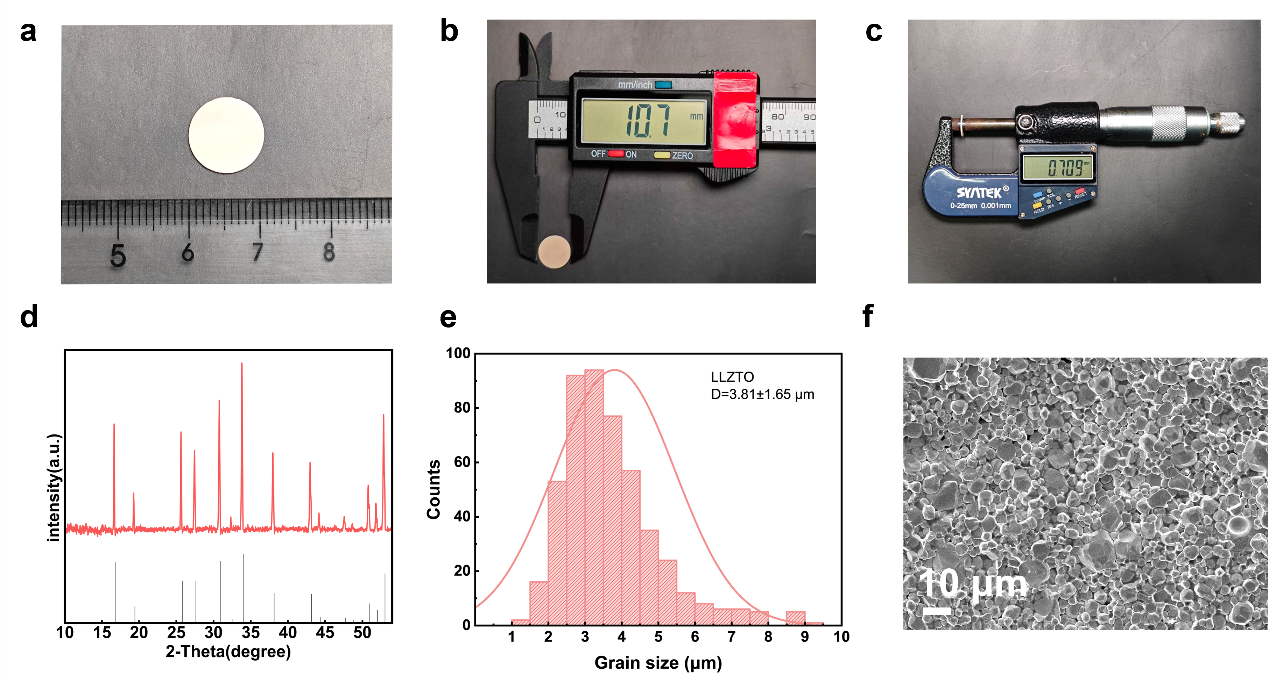


**Supplementary Fig. 1 Geometry and structure of cubic LLZTO pellets.** (a) Optical photograph of a polished LLZTO pellet. (b)-(c) Polished LLZTO pellet with its measured diameter (10.7 mm) by digital caliper and thickness (0.709 mm) by micrometer. (d) X-ray diffraction pattern of the pristine LLZTO pellets and the corresponding reference pattern (black), ICDD PDF No. 01-090-2954. (e)-(f) The distribution of grain size and cross section SEM image of LLZTO pell


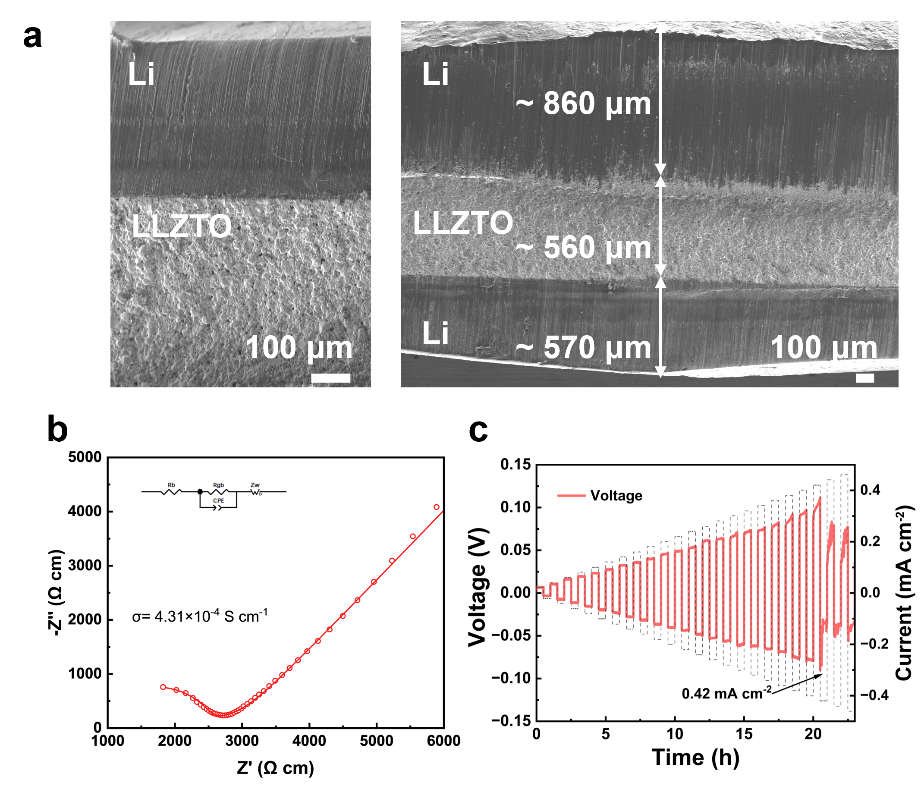


**Supplementary Fig. 2. Structure and electrochemical characteristics of Li|LLZTO|Li cells.** (a) Cross-sectional SEM images of a symmetric cell prepared by the molten-Li wetting method. Continuous Li metal layers are formed on both sides of the LLZTO pellet, with representative thicknesses of ~860 μm (top) and ~570 μm (bottom); the LLZTO pellet is ~560 μm. (b) Electrochemical impedance spectrum for LLZTO pellets measured at 25 ℃. The thickness and area of samples are normalized. (c) Voltage and current profiles of the lithium symmetric cell under varying current densities at room temperature.


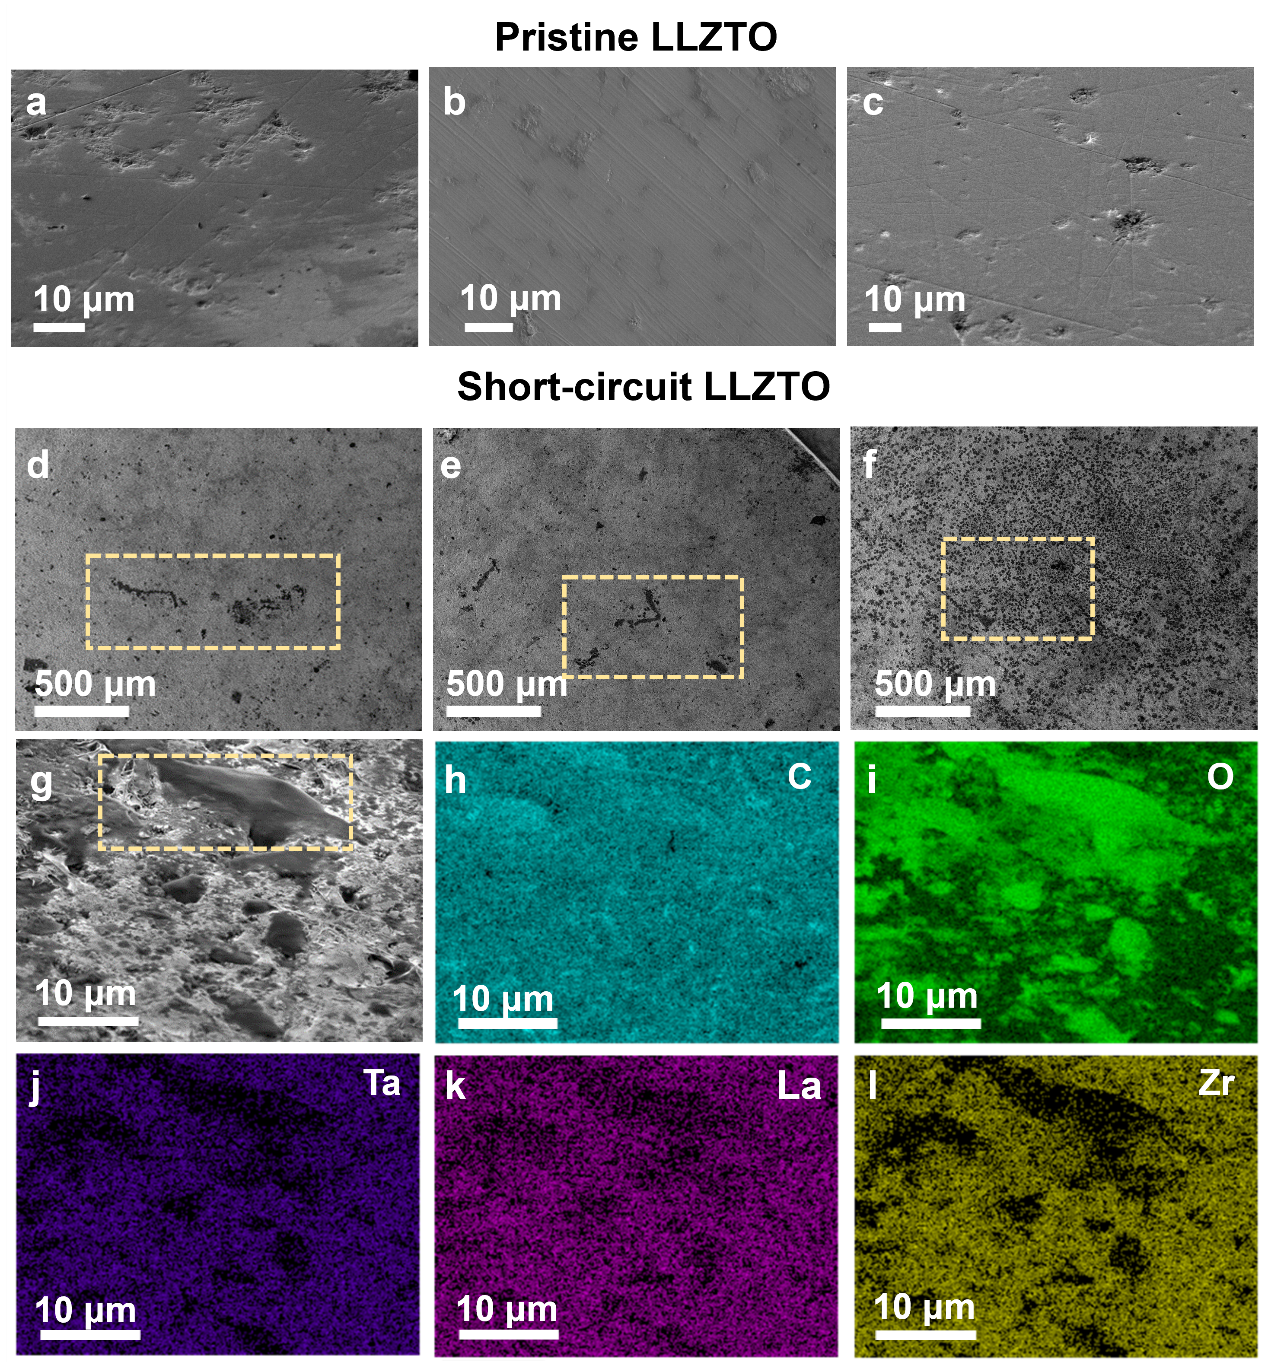


**Supplementary Fig. 3. The SEM images of surface morphology.** (a)-(c) The SEM images of the pristine LLZTO pellet. The (d)-(g) SEM images and (h)-(l) corresponding EDS mappings of the cycled LLZTO pellet surface morphology at the short-circuit region.


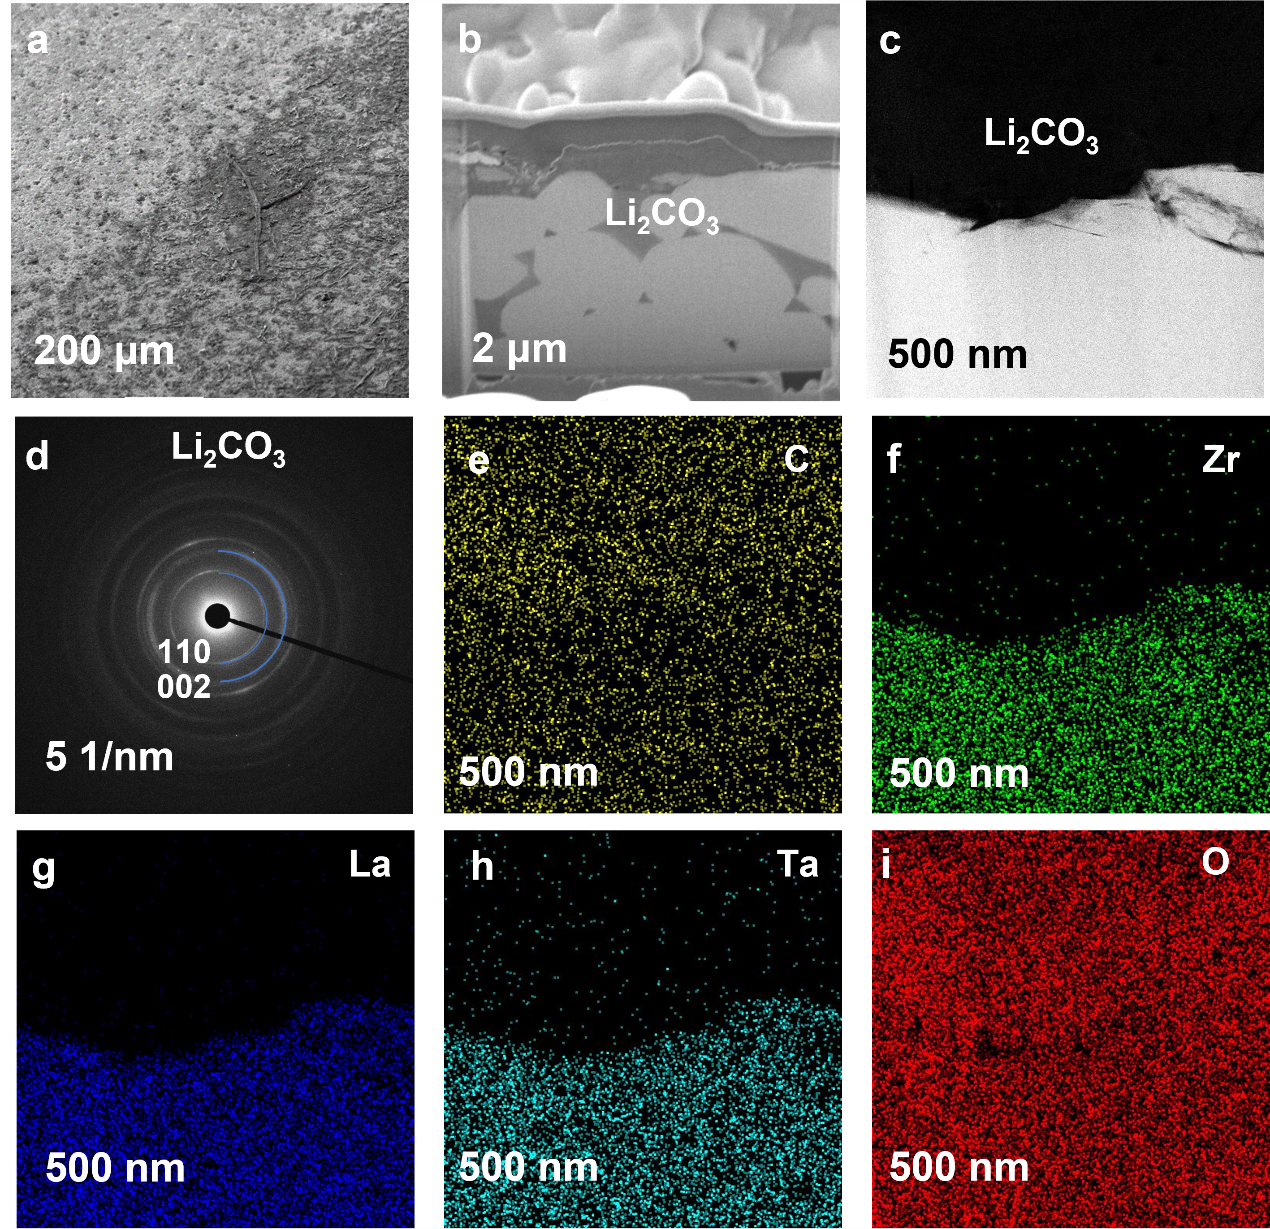


**Supplementary Fig. 4. Structure characterizations of Li2CO3 at cycled LLZTO pellet surface.** The morphology of (a) surface, (b) cross-section. The (c) annular dark-field scanning transmission electron microscopy (ADF-STEM) images and (e)-(f) corresponding EDS mappings of Li2CO3.


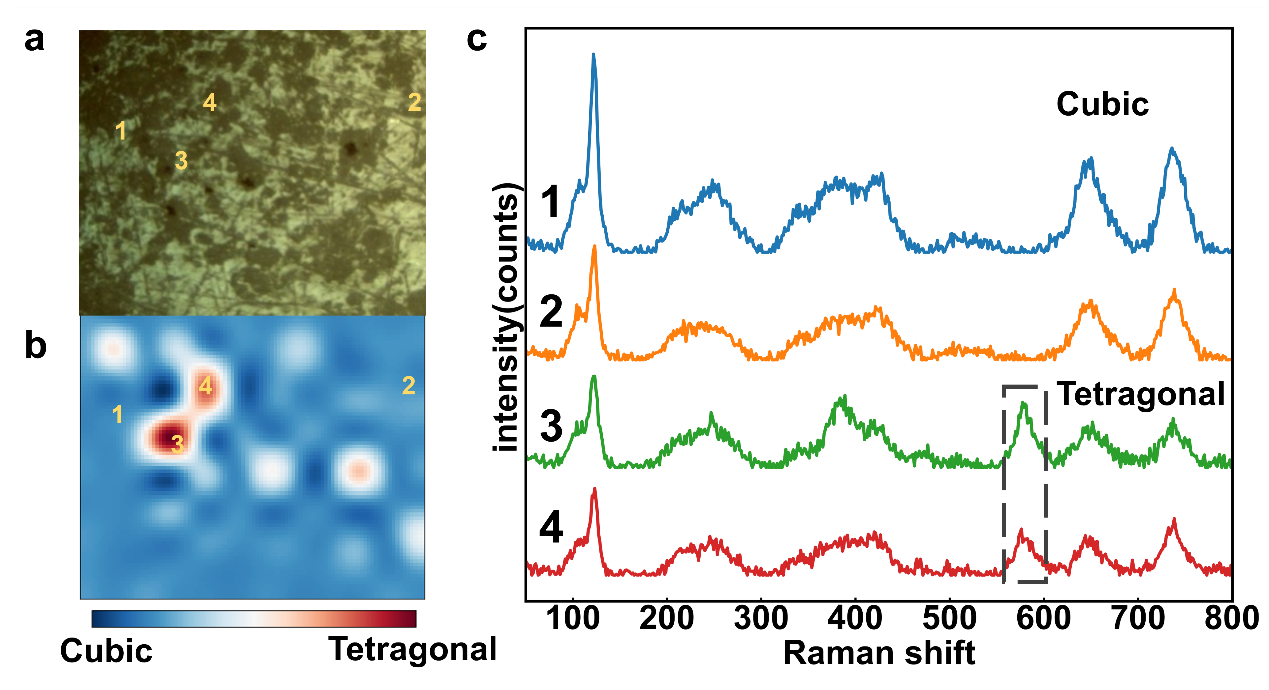


**Supplementary Fig. 5 Raman spectroscopic evaluation of the tetragonal phase in LLZTO during failure.** (a)-(b) The optical micrograph and corresponding Raman mapping in LLZTO after failure. The black spots are the regions where the short-circuiting occurred. (c) Representative spectra from the labeled positions: Regions 1 and 2 correspond to the cubic phase, while Regions 3 and 4 correspond to the tetragonal phase due to a new peak about 580 cm⁻¹.


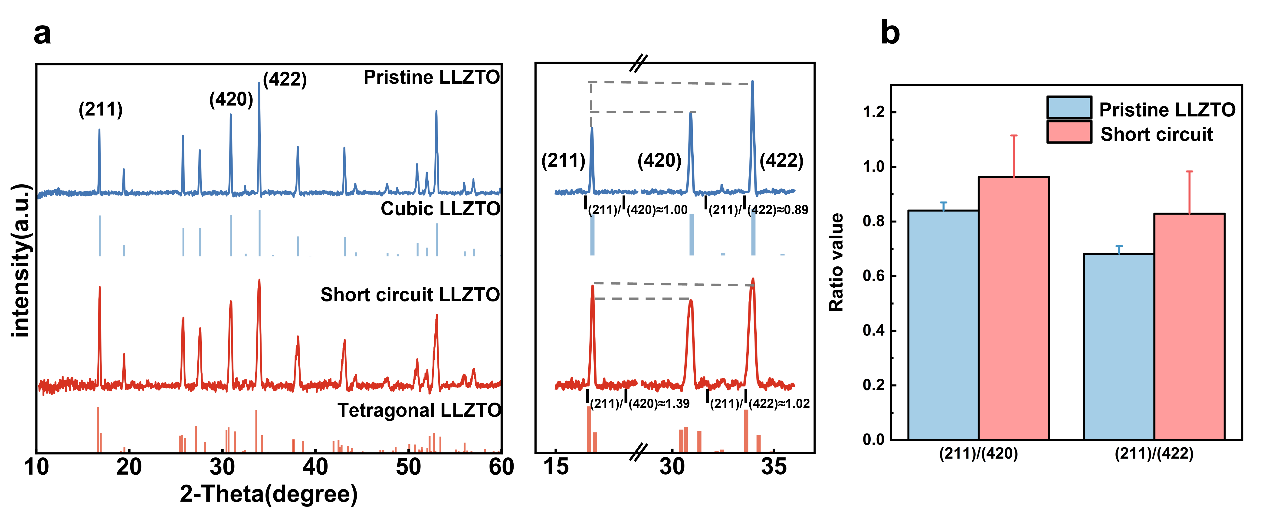


**Supplementary Fig. 6. XRD evaluation of the tetragonal phase in LLZTO during failure.** (a) XRD pattern of LLZTO before and after failure. The intensity ratios of I (211)/ I (422) and I (211)/ I (420) for the standard cubic phase and tetragonal LLZTO. (b) Comparison of the diffraction intensity ratios of the (211)/ (422) and (211)/(420) reflections before and after failure, suggesting the emergence of a tetragonal phase component upon electrochemical degradation. During the phase transition from cubic LLZTO (C-LLZTO) to tetragonal LLZTO (T-LLZTO), the lattice parameters change from a = b = c to a = b > c, leading to notable variations in the diffraction intensities of key reflections-specifically, the (112), (420), and (422) planes. The strongest reflection from the (422) plane is replaced by that from the (211) plane, while the secondary peak (420) splits into three distinct peaks with significantly reduced intensity. Consequently, the intensity ratios I (211)/ I (422) and I (211)/ I (420) increase upon phase transition. ICDD PDF cubic LLZTO: 01-090-2954, tetragonal LLZTO: 00-064-0140.


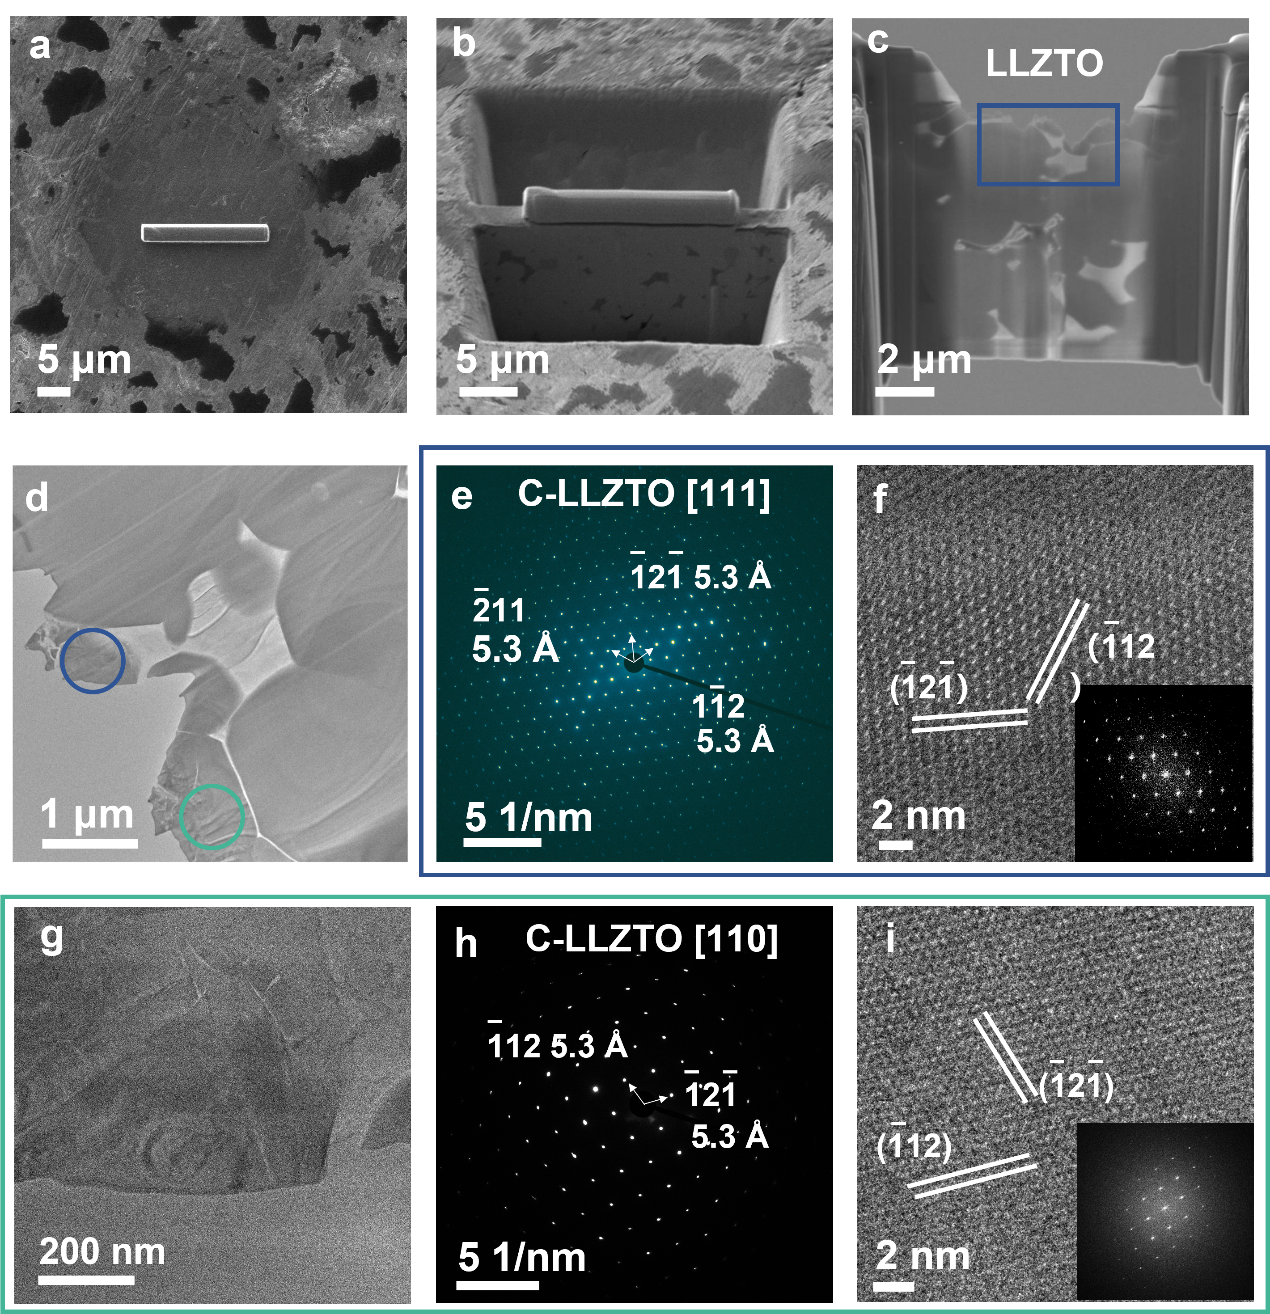


**Supplementary Fig. 7. Structure characterizations of pristine LLZTO pellet.** The morphology of (a) surface, (b) cross-section (c) and milled lamella. (d), (g) The locally magnified TEM images, (e), (h) SAED patterns, (f), (i) HRTEM images match the [111] and [110] zone axis of C-LLZTO. The corresponding power spectra of (f), (i) are shown in the inset of (f), (i).


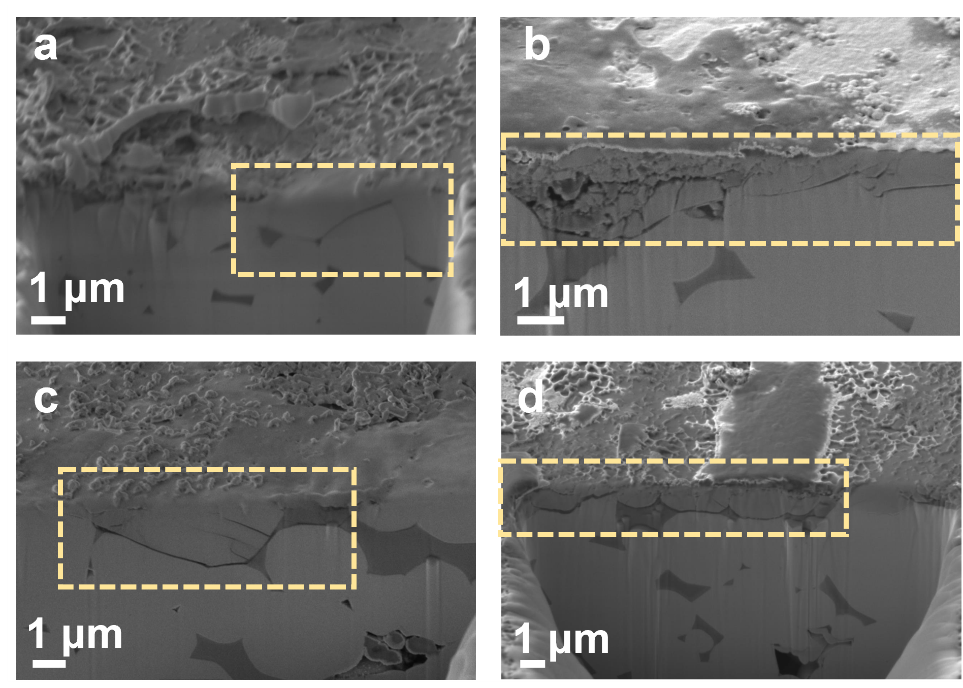


**Supplementary Fig. 8. The SEM images of the cycled LLZTO pellet subsurface morphology at the short-circuits region.** The yellow box highlights Li dendrites propagating into the interior of the SSEs. (a) Dendrites propagating through grains (intragranular). (b-d) Dendrites propagating along grain boundaries (intergranular)


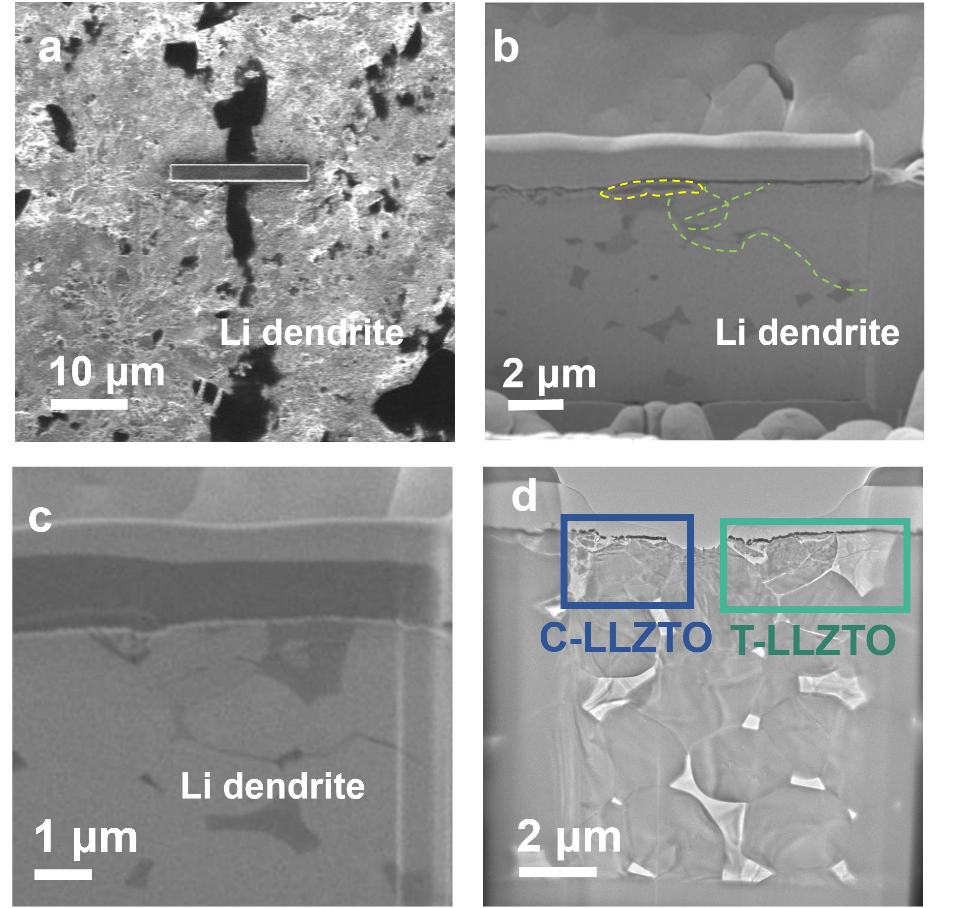


**Supplementary Fig. 9. The structural characteristics of lithium dendrites penetrating single-crystal LLZTO grains.** The morphology of (a) surface, (b)-(c) cross-section and (d) milled lamella of penetrated LLZTO pellet.


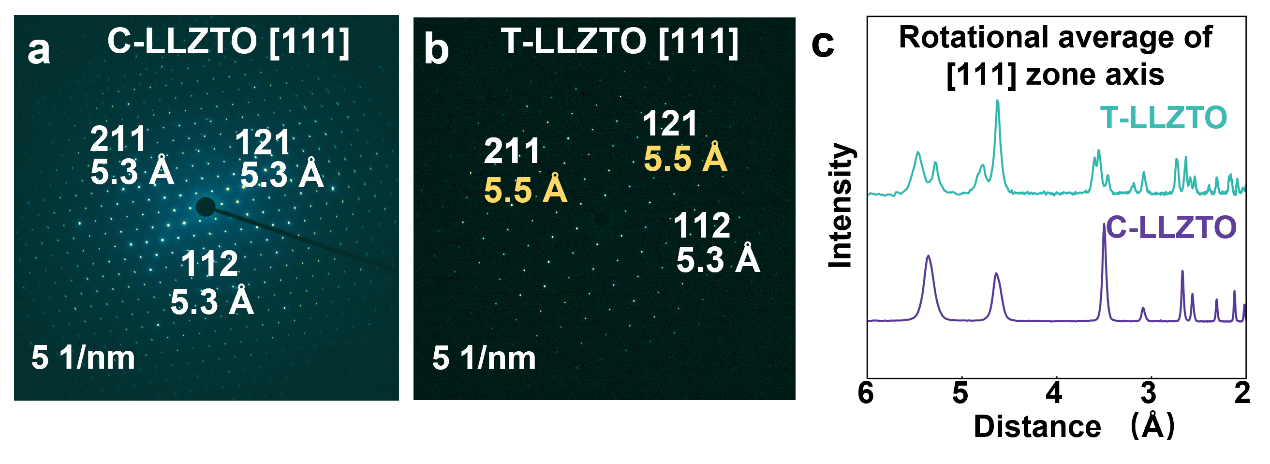


**Supplementary Fig. 10.** The (a-b) SAED patterns and (c) rotational average results of C-LLZTO (Fig. 3b) and T-LLZTO (Fig. 3j).


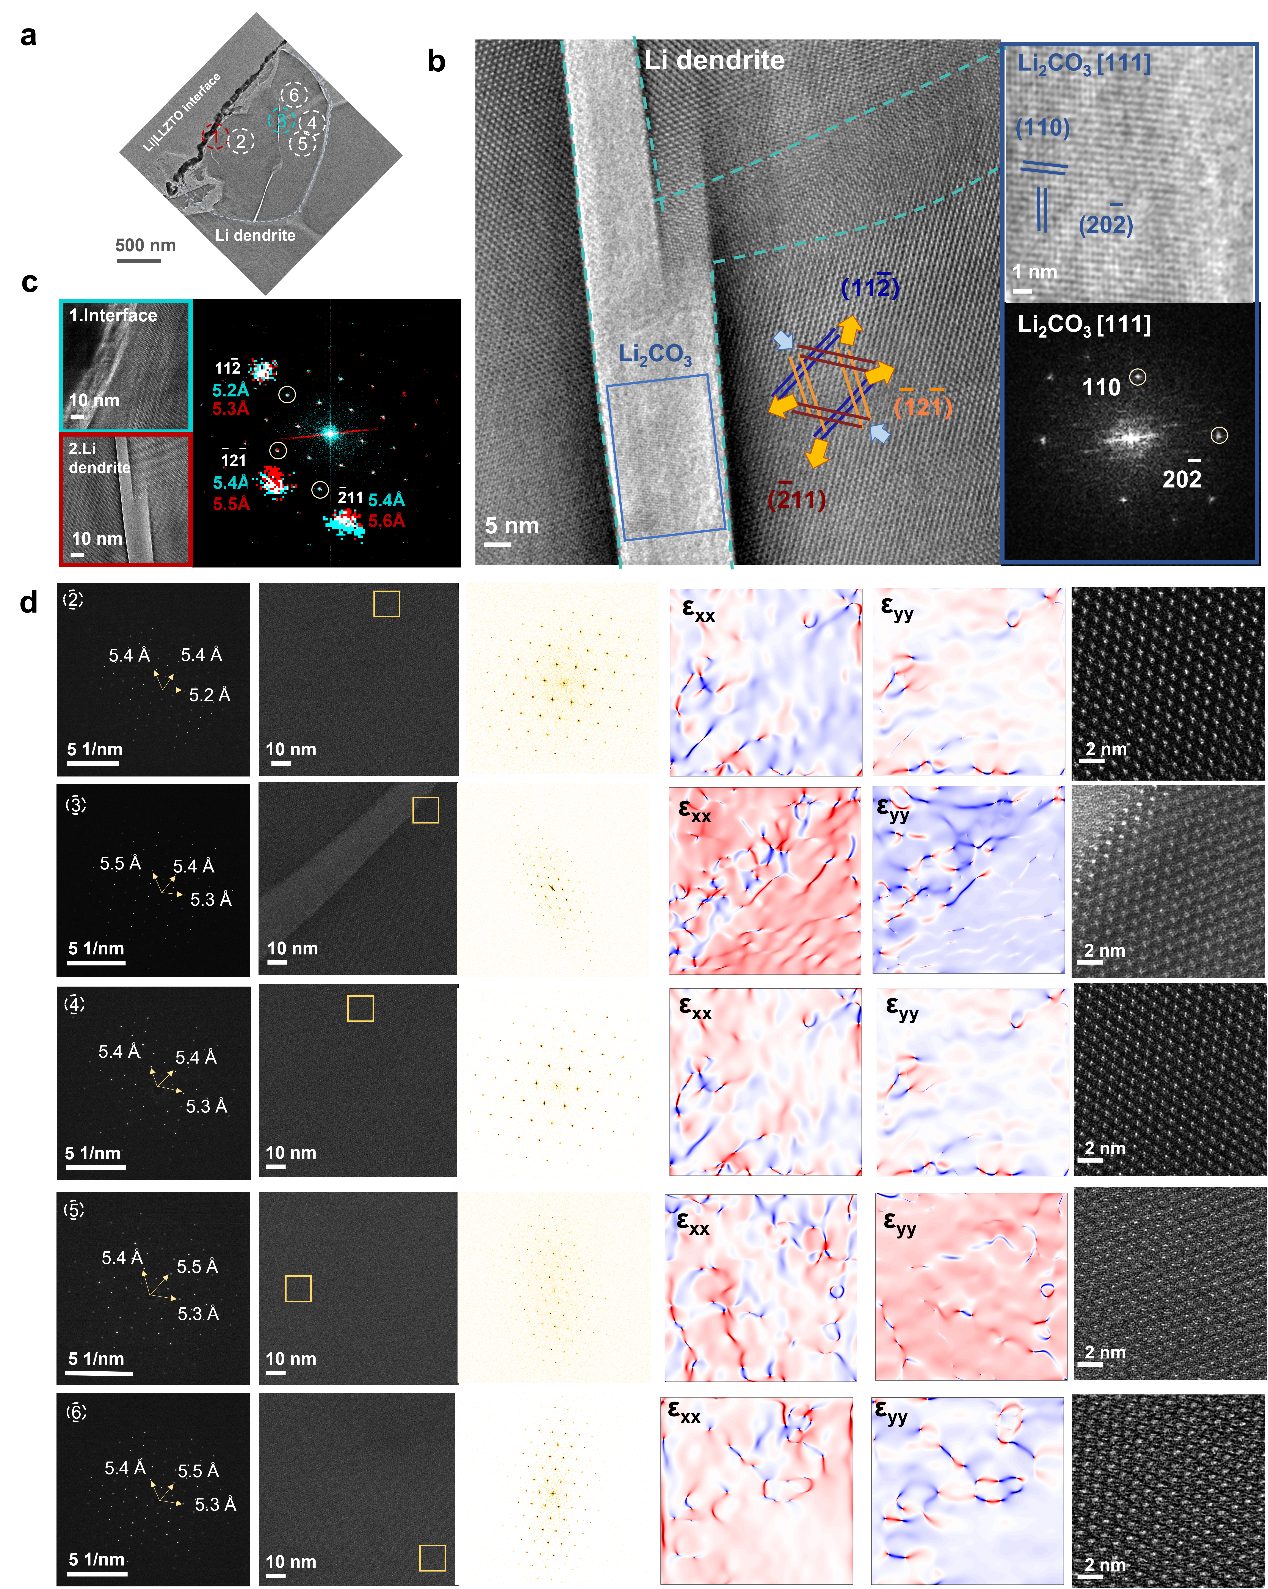


**Supplementary Fig. 11. The HRTEM characteristics of single-crystal LLZTO grains penetrated by lithium dendrites.** (a)The low-magnification TEM image and (b) locally magnified HRTEM image of penetrated single-crystal LLZTO grain. (c) The HRTEM images and overlapped corresponding power spectra of LLZTO near the interface (region 1, red) and Li dendrites (region 3, blue). (d) The SAED patterns, HRTEM images and corresponding power spectra, in-plane strain maps (εxx, εyy), locally magnified HRTEM images of region in (a).


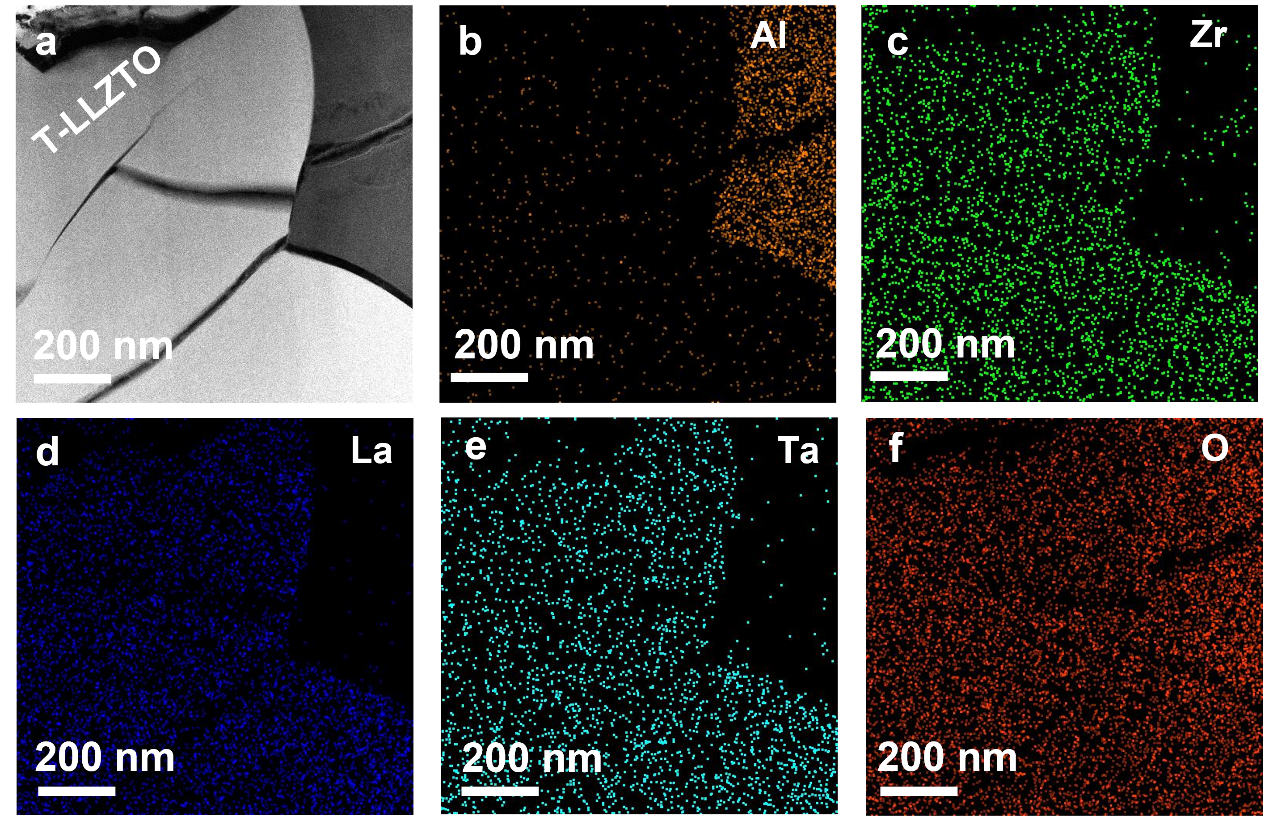


**Supplementary Fig. 12.** **The EDS characteristics of lithium dendrites penetrating single-crystal LLZTO grains.** (a)The annular dark-field scanning transmission electron microscopy (ADF-STEM) image and (b)-(f) corresponding EDS mappings of the lithium dendrites penetrating single-crystal LLZTO grains.


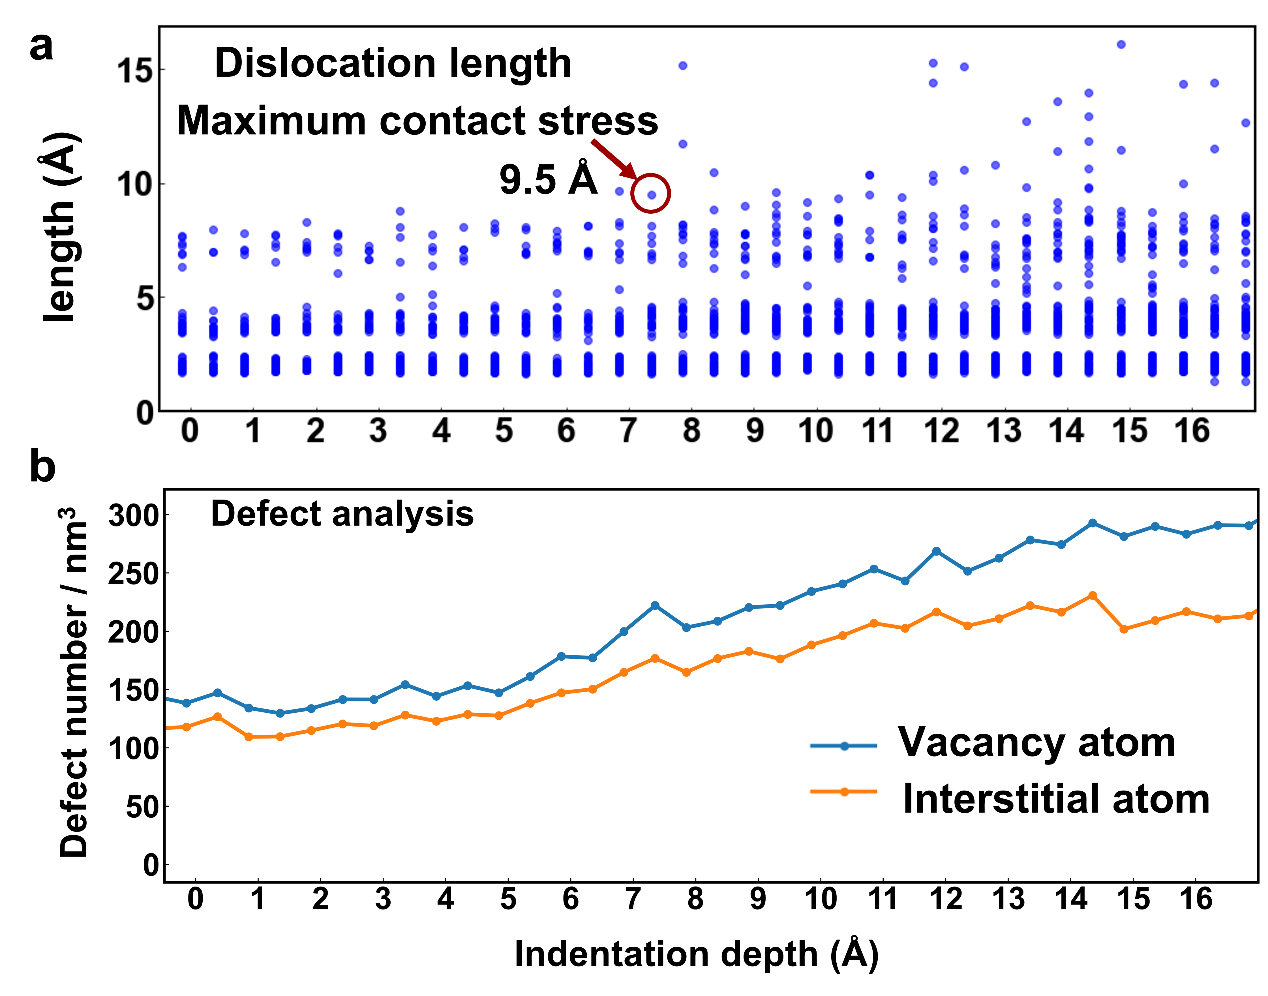


**Supplementary Fig. 13.** Dependence of (a) dislocation length and (b) defect atom density (number nm-3) on indentation depth during a virtual Li-dendrite penetration simulation in LLZTO.


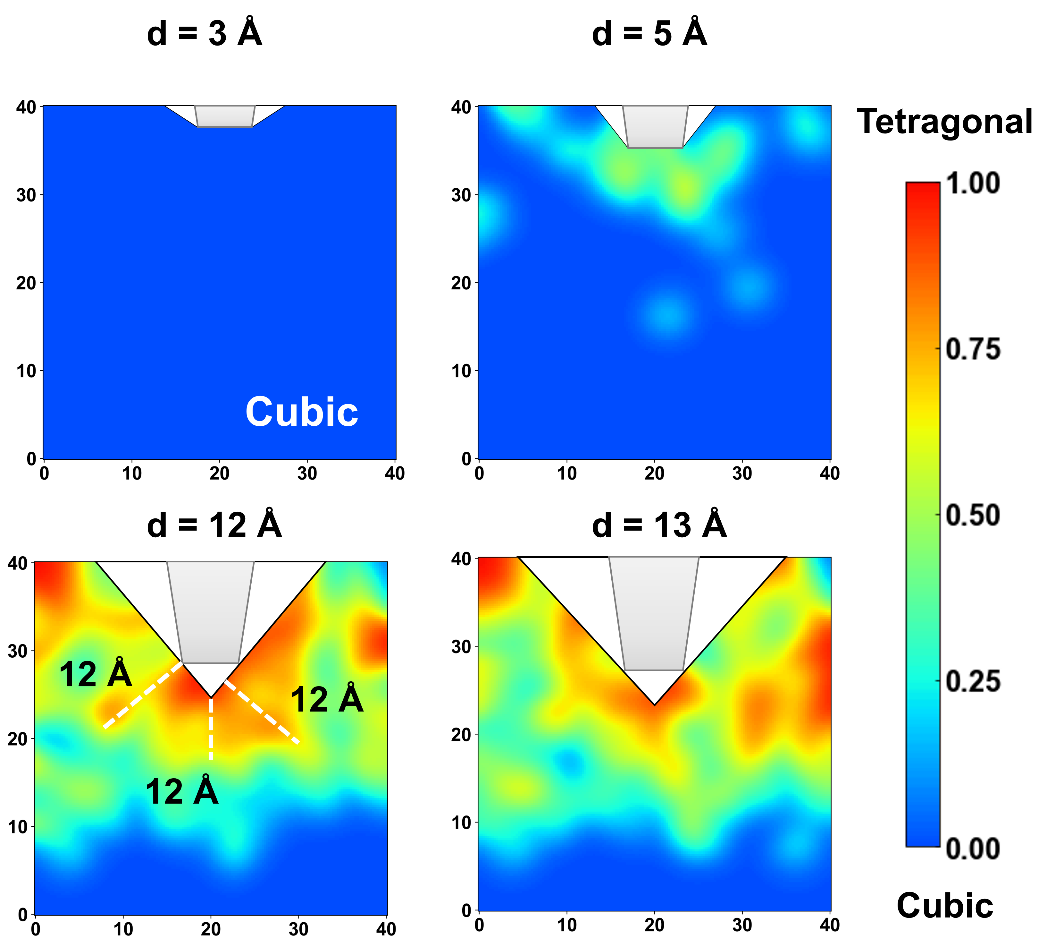


**Supplementary Fig. 14.** Quantitative analysis of the phase transition fraction mappings of LLZTO during lithium dendrite penetration process at indentation depths of 3 Å, 5 Å, 12 Å and 13 Å.


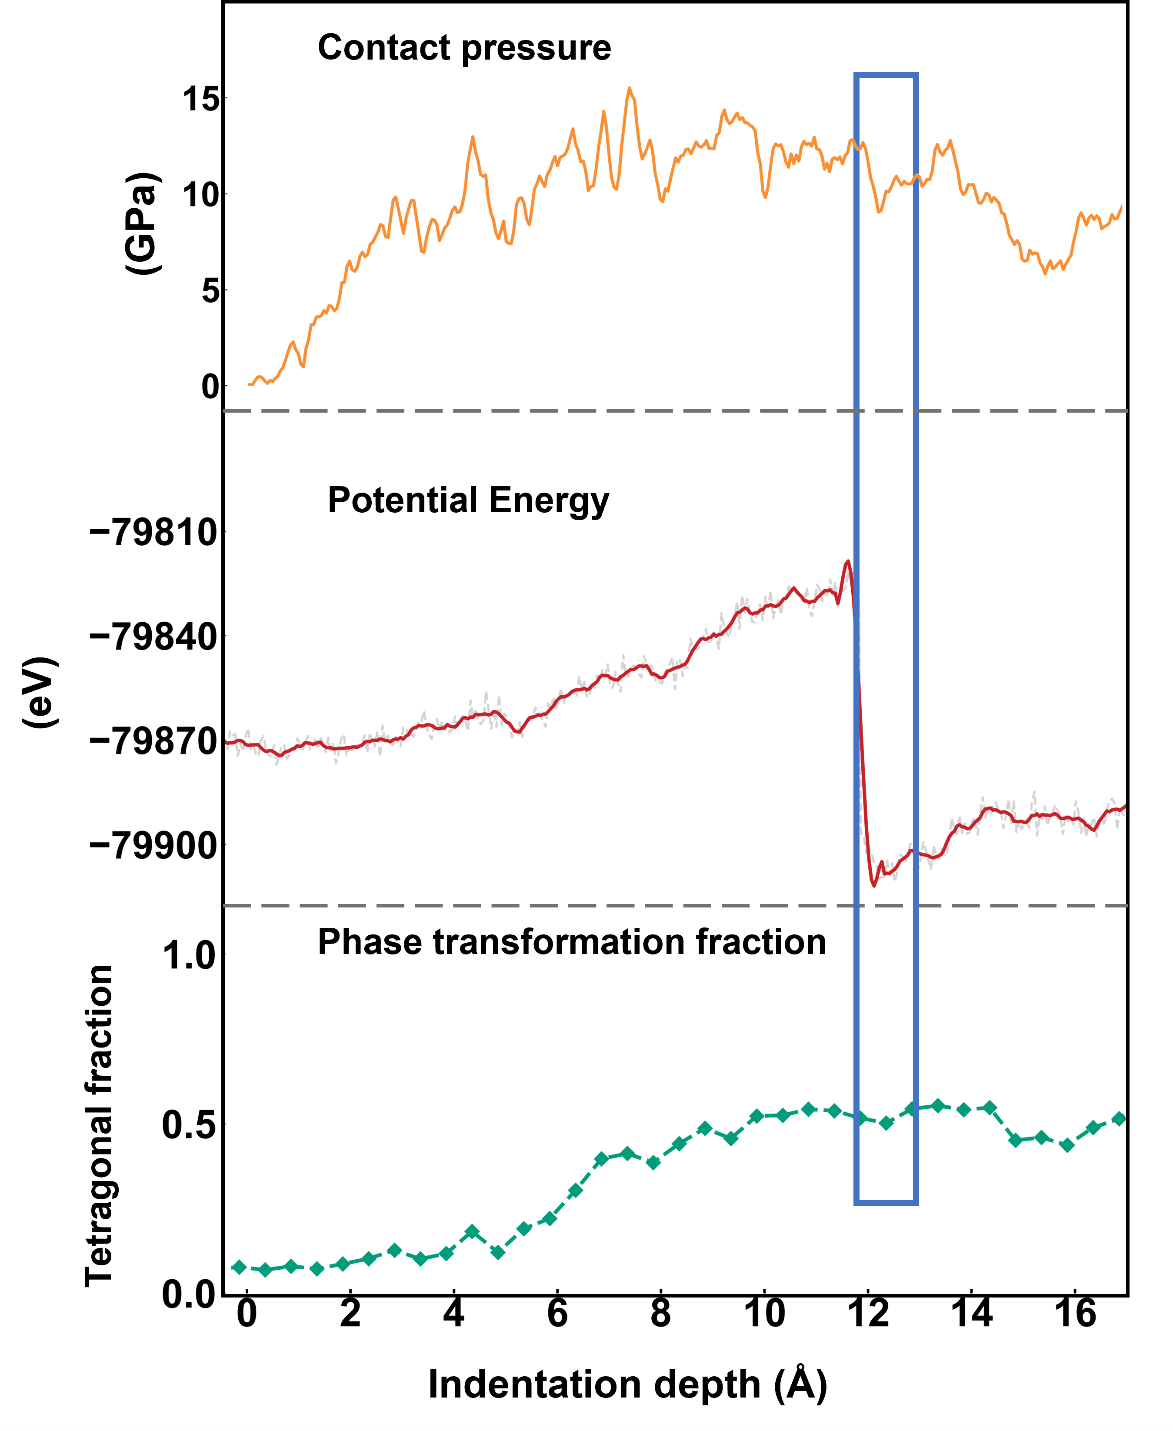


**Supplementary Fig. 15.** The contact pressure, potential energy and phase transition fraction as functions of indentation depth during the virtual Li dendrite penetration process in LLZTO.


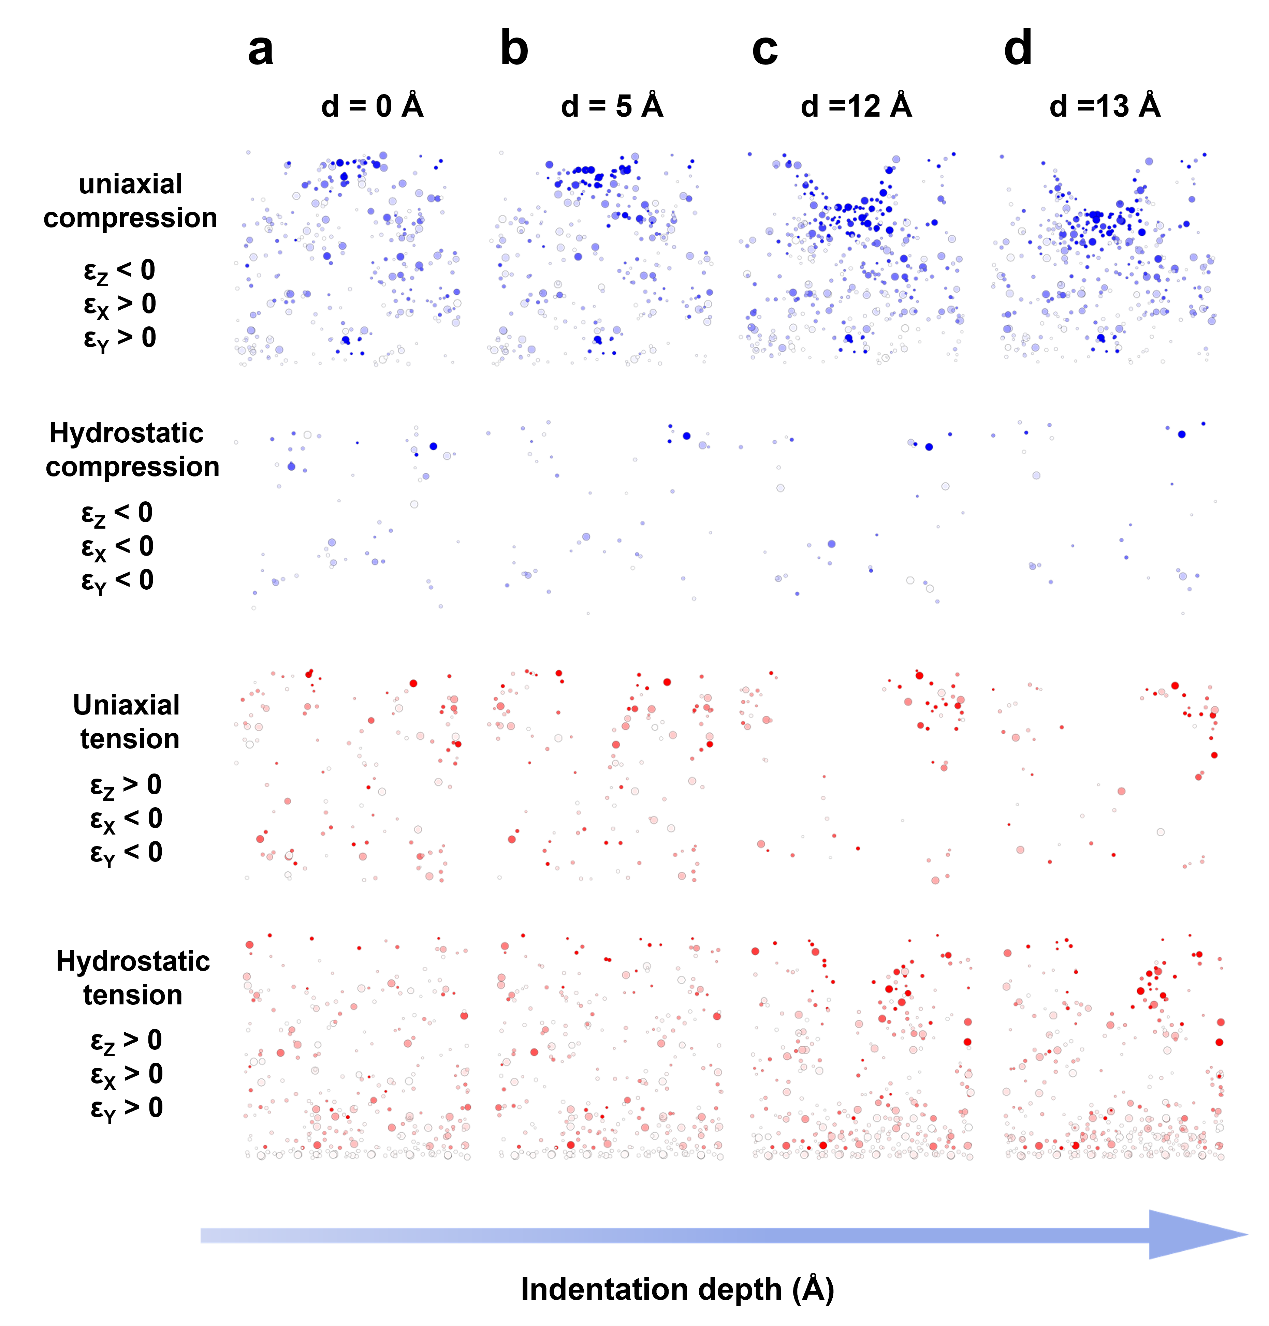


**Supplementary Fig. 16.** Decomposed strain distribution along the X, Y, and Z directions at indentation depths of 3 Å, 5 Å, 12 Å and 13 Å.


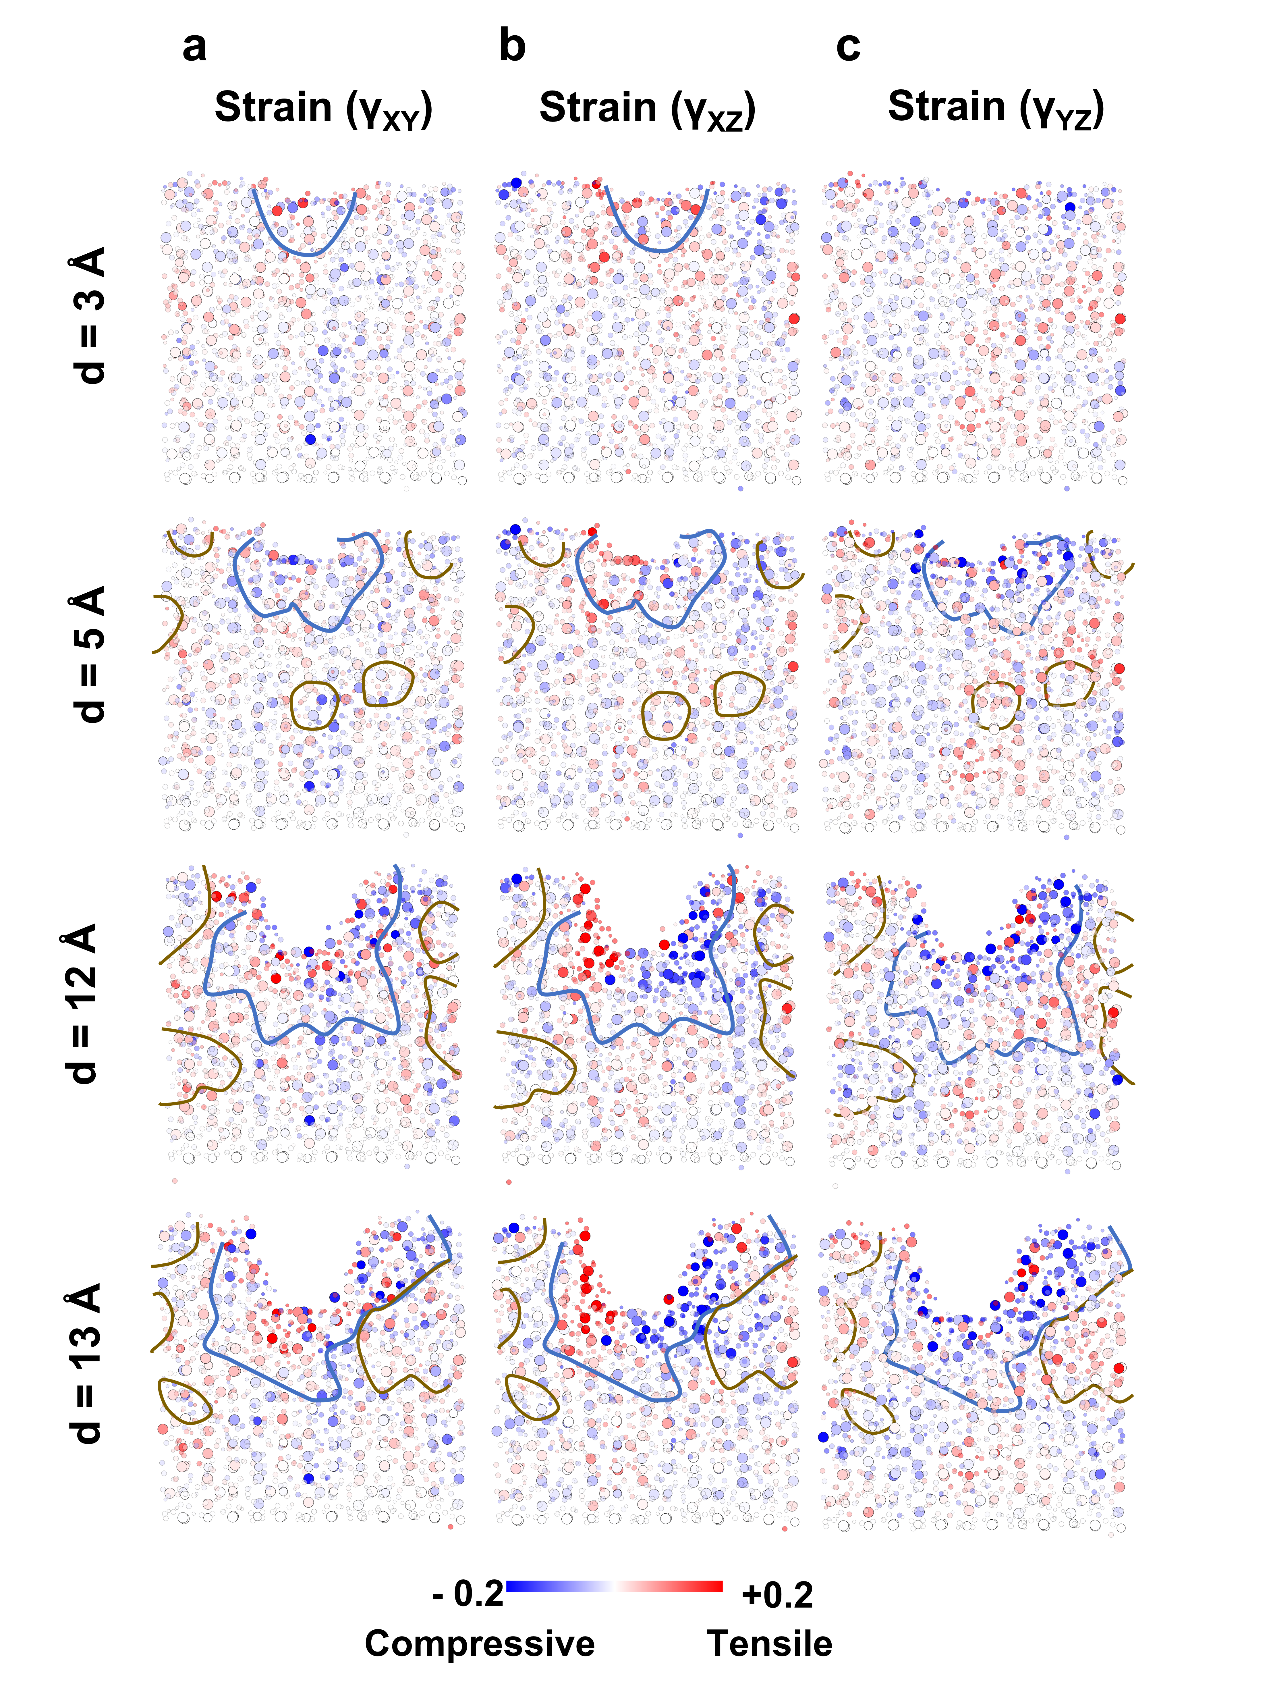


**Supplementary Fig. 17.** Shear strain distribution maps along the (a) γXY, (b) γXZ and (c) γYZ planes during indentation at indentation depths of 3 Å, 5 Å, 12 Å and 13 Å.

**Supplementary Table 1.** The fit to the displacement field in Fig.2

|  | Slope | R-square |
| --- | --- | --- |
| Least-square fit to Circle 1 | 0.345±0.027 (2.168) | 0.9729 |
| Least-square fit to Circle 2 | 0.448±0.029 (2.815) | 0.9712 |
| Least-square fit to Circle 3 | 0.470±0.028 | 0.9592 |
| Linear elastic model of (323) screw dislocation | 0.337 | / |
| Linear elastic model of (112) screw dislocation | 0.458 | / |
| Linear elastic model of (420) screw dislocation | 0.471 | / |

**Supplementary Table 2.** The diffraction intensity ratios of the 211 to 420 planes and the 211 to 422 planes for the pristine LLZTO and short circuit LLZTO, where ‘S’ denotes the short-circuit condition.

|  | 211 | | 420 | | 422 | | 211/420 | 211/422 |
| --- | --- | --- | --- | --- | --- | --- | --- | --- |
|  | 2-Theta | Intensity | 2-Theta | Intensity | 2-Theta | Intensity | ratio1 | ratio2 |
| 1 | 16.64 | 1383.92 | 30.77 | 1694.57 | 33.80 | 2185.13 | 0.82 | 0.63 |
| **1-S** | **16.72** | **1191.38** | **30.77** | **1028.32** | **33.70** | **1297.60** | **1.16** | **0.92** |
| 2 | 16.62 | 1280.28 | 30.75 | 1838.79 | 33.80 | 2285.91 | 0.70 | 0.56 |
| **2-S** | **16.62** | **1110.34** | **30.75** | **1564.13** | **33.76** | **1862.13** | **0.71** | **0.60** |
| 3 | 16.66 | 1184.86 | 30.79 | 1543.22 | 33.82 | 2049.60 | 0.77 | 0.58 |
| **3-S** | **16.82** | **1327.76** | **30.93** | **1635.66** | **33.98** | **2053.68** | **0.81** | **0.65** |
| 4 | 16.66 | 1189.44 | 30.79 | 1445.12 | 33.84 | 1887.36 | 0.82 | 0.63 |
| **4-S** | **16.82** | **1600.49** | **30.93** | **1838.45** | **33.98** | **2203.36** | **0.87** | **0.73** |
| 5 | 16.64 | 1240.27 | 30.75 | 1536.37 | 33.80 | 2152.26 | 0.81 | 0.58 |
| **5-S** | **16.51** | **945.90** | **30.60** | **808.85** | **33.68** | **1014.51** | **1.17** | **0.93** |
| 6 | 16.62 | 1286.08 | 30.75 | 1700.23 | 33.78 | 2287.47 | 0.76 | 0.56 |
| **6-S** | **16.68** | **1448.62** | **30.81** | **1733.96** | **33.84** | **2229.78** | **0.84** | **0.65** |
